# Supplementary material
Source: publisher figshare collection journal article supplement (https://acs.figshare.com/ndownloader/files/3749449)
Supplement: Supplementary file 1 [file 3749449]

# PCB Food Web Dynamics Quantify Nutrient and Energy Flow in Aquatic Ecosystems

*AUTHOR NAMES. Anne M. McLeod\*, Gordon Paterson, Ken G. Drouillard, G. Douglas Haffner*

*AUTHOR ADDRESS. Great Lakes Institute for Environmental Research, University of Windsor, Ontario, Canada N9B3P4. Correspondence to: [mcleod15@uwindsor.ca](mailto:mcleod15@uwindsor.ca), (519) 253-3000 ext 3752.*

File consists of one supporting table and one supporting figure.

**Table S1.**

| PCB     | $\log K_{OW}^{a, 21}$ | $E_{d, PCB_i}^{b, 25}$ | $f_{PCBi}^{c, 24}$ |
|---------|-----------------------|------------------------|--------------------|
| 18/17   | 5.1                   | 0.802                  | 0.96               |
| 31/28   | 5.67                  | 0.699                  | 0.71               |
| 48      | 5.85                  | 0.667                  | 0.86               |
| 44      | 5.75                  | 0.685                  | 0.86               |
| 70      | 6.2                   | 0.604                  | 0.88               |
| 99      | 6.39                  | 0.570                  | 0.93               |
| 87      | 6.29                  | 0.588                  | 0.91               |
| 110     | 6.48                  | 0.554                  | 0.93               |
| 118     | 6.74                  | 0.507                  | 0.96               |
| 153     | 6.85                  | 0.487                  | 0.96               |
| 105/132 | 6.7                   | 0.514                  | 0.91               |
| 138     | 6.83                  | 0.491                  | 0.96               |
| 158     | 7.02                  | 0.456                  | 0.97               |
| 187     | 7.17                  | 0.429                  | 0.98               |
| 183     | 7.2                   | 0.424                  | 0.97               |
| 128     | 6.74                  | 0.507                  | 0.96               |
| 156/171 | 7.2                   | 0.424                  | 0.97               |
| 180     | 7.36                  | 0.395                  | 0.98               |
| 170     | 7.31                  | 0.404                  | 0.98               |
| 201     | 7.2                   | 0.424                  | 0.985              |
| 195/208 | 7.65                  | 0.343                  | 0.983              |
| 194     | 7.8                   | 0.316                  | 0.98               |
| 206     | 8.09                  | 0.264                  | 0.989              |
| 209     | 8.18                  | 0.248                  | 0.99               |

<sup>a</sup> the octanol-water partition coefficient as reported in Hawker and Connell, 1988.

<sup>b</sup> the organism's assimilation efficiency of PCB<sub>i</sub> as reported in Liu et al. 2006.

<sup>c</sup> the fraction of PCB<sub>i</sub> accumulated from dietary sources as reported in Arnot and Gobas 2004.

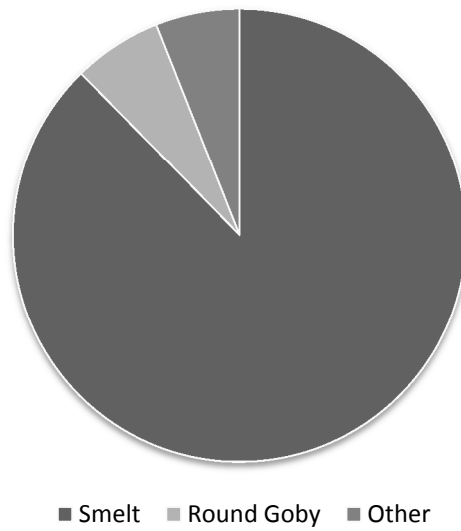

**Figure S1.** Results from gut content analyses on Lake Trout from Lake Huron. Proportions are based on the number of each prey item obtained.
